# Supplementary material for: High Intensity Interval Training Favourably Affects Angiotensinogen mRNA Expression and Markers of Cardiorenal Health in a Rat Model of Early-Stage Chronic Kidney Disease
Source: PubMed Central journal article supplement (PMC4458272; doi:10.1155/2015/156584), 2015-05-24
Supplement: 156584.f1.pdf [file 156584.f1.pdf]

## Supplement 1. Disease Modelling – Background and Rationale

To mimic early-stage CKD, renal function was artificially reduced by performing a unilateral nephrectomy. Briefly, a small lumbar incision was made and the left kidney was removed from each rat. Unilateral nephrectomies are an appropriate model of early-stage CKD in rats, as opposed to the commonly used 5/6 nephrectomy which more closely models end-stage renal disease. Unilateral nephrectomies result in compensatory enlargement of the remnant kidney [61-65], increased serum creatinine concentrations [63, 66, 67], increased focal glomerulosclerosis [68, 69], increased mesangial sclerosis [68], increased interstitial fibrosis [68], increased proteinuria [66, 68, 70], and increased urinary albumin excretion [69]. In addition to nephrectomising the rats, SHR<sub>s</sub> were used to mimic the elevated blood pressure that is common in CKD. In male SHR<sub>s</sub>, that have not undergone a nephrectomy, systolic blood pressure consistently increases at a rate of approximately 3.5 mmHg per week beginning at approximately 8 weeks of age, the initiation of intervention in the present study, plateauing at roughly 16 weeks of age, the termination of intervention in the present study [71, 72]. In addition, SHR<sub>s</sub> have fewer glomeruli than other strains [73], resulting in a reduced glomerular volume which is thought to influence blood pressure, making SHR<sub>s</sub> an appropriate model for hypertension- and CKD-related research.

## References

61. Benipal, B. and L.H. Lash, *Modulation of mitochondrial glutathione status and cellular energetics in primary cultures of proximal tubular cells from remnant kidney of uninephrectomized rats*. *Biochem Pharmacol*, 2013. **85**(9): p. 1379-88.
62. Lopez-Novoa, J.M., et al., *Functional compensatory changes after unilateral nephrectomy in rats. General and intrarenal hemodynamic alterations*. *Ren Physiol*, 1982. **5**(2): p. 76-84.
63. Orsic, V., et al., *Impaired kidney function in rats six months after unilateral nephrectomy - an old story, a new perspective*. *Med Glas (Zenica)*, 2011. **8**(2): p. 185-91.
64. Provoost, A.P. and J.C. Molenaar, *Changes in the glomerular filtration rate after unilateral nephrectomy in rats*. *Pflugers Arch*, 1980. **385**(2): p. 161-5.
65. Shirley, D.G. and S.J. Walter, *Acute and chronic changes in renal function following unilateral nephrectomy*. *Kidney Int*, 1991. **40**(1): p. 62-8.
66. Rodriguez-Gomez, I., et al., *Long-term consequences of uninephrectomy in male and female rats*. *Hypertension*, 2012. **60**(6): p. 1458-63.
67. Steffes, M.W., D.M. Brown, and S.M. Mauer, *Diabetic glomerulopathy following unilateral nephrectomy in the rat*. *Diabetes*, 1978. **27**(1): p. 35-41.
68. Adler, S., et al., *Studies of progressive glomerular sclerosis in the rat*. *Am J Pathol*, 1986. **123**(3): p. 553-62.
69. Celsi, G., S.O. Bohman, and A. Aperia, *Development of focal glomerulosclerosis after unilateral nephrectomy in infant rats*. *Pediatr Nephrol*, 1987. **1**(3): p. 290-6.
70. Simons, J.L., et al., *Pathogenesis of glomerular injury in the fawn-hooded rat: effect of unilateral nephrectomy*. *J Am Soc Nephrol*, 1993. **4**(6): p. 1362-70.
71. Cejka, J., et al., *LVV-hemorphin-7 lowers blood pressure in spontaneously hypertensive rats: radiotelemetry study*. *Physiol Res*, 2004. **53**(6): p. 603-7.
72. Firbas, U., W. Michlits, and S. Aharinejad, *Venous sphincters in the choroidea of spontaneously hypertensive rats*. *Anat Rec A Discov Mol Cell Evol Biol*, 2005. **284**(2): p. 537-43.
73. Black, M.J., et al., *Is there an association between level of adult blood pressure and nephron number or renal filtration surface area?* *Kidney Int*, 2004. **65**(2): p. 582-8.
